# Supplementary material for: Seroconversion and Kinetics of Vibriocidal Antibodies during the First 90 Days of Re-vaccination with Oral Cholera Vaccine in an Endemic Population
Source: Preprints.org preprint supplement (doi:10.20944/preprints202402.0582.v1), 2024-02-09
Supplement: Supplementary file 2 [file supplementary]

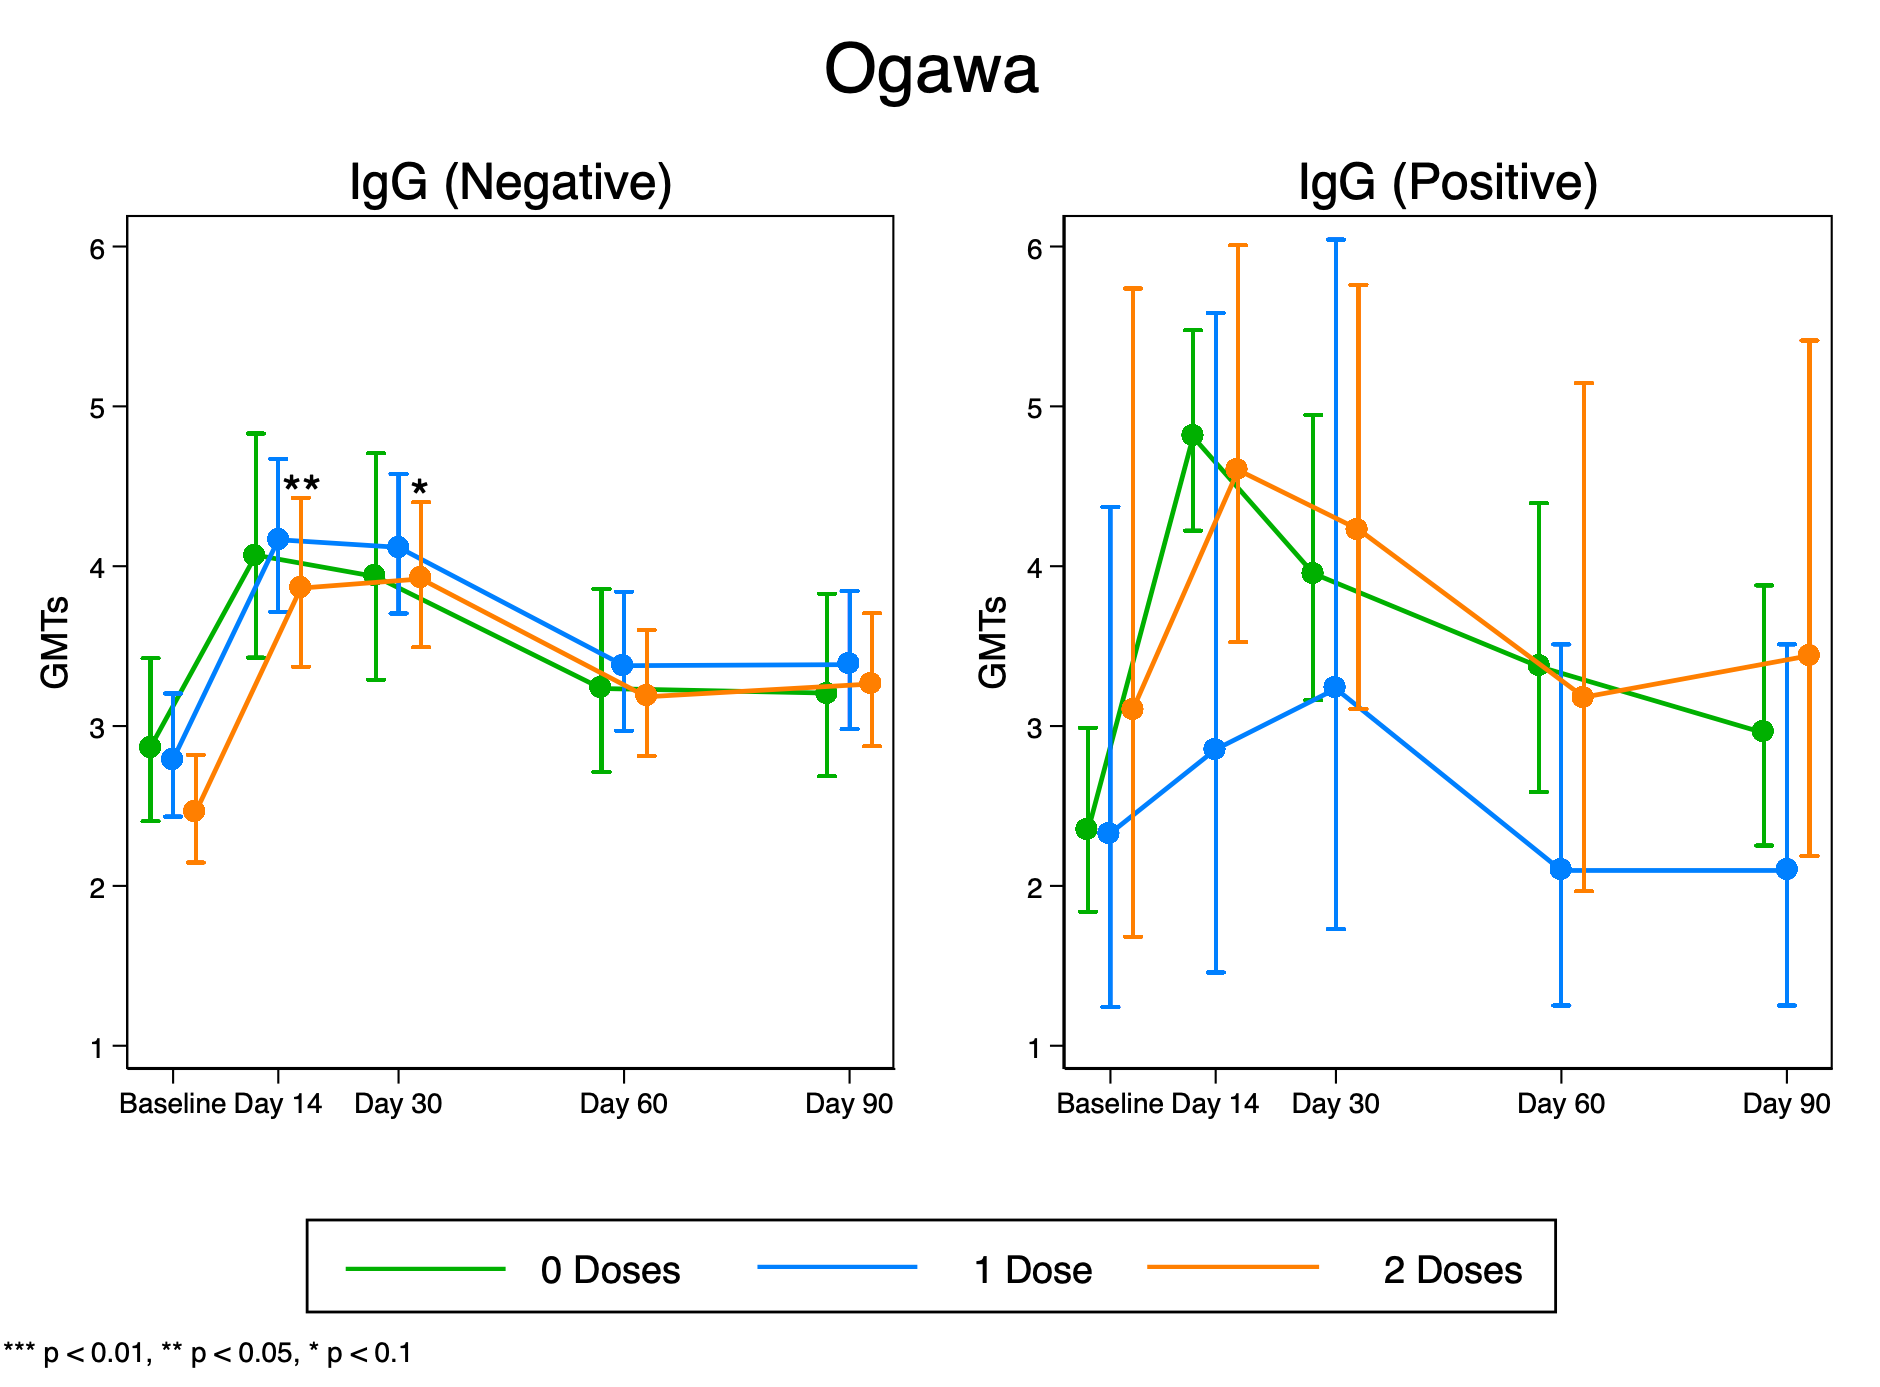


**Scheme 1.** Shows vibriocidal geometric mean antibody titres to Ogawa in participants with high (positive) or lower (negative) baseline IgG antibodies across treatment arms.>.


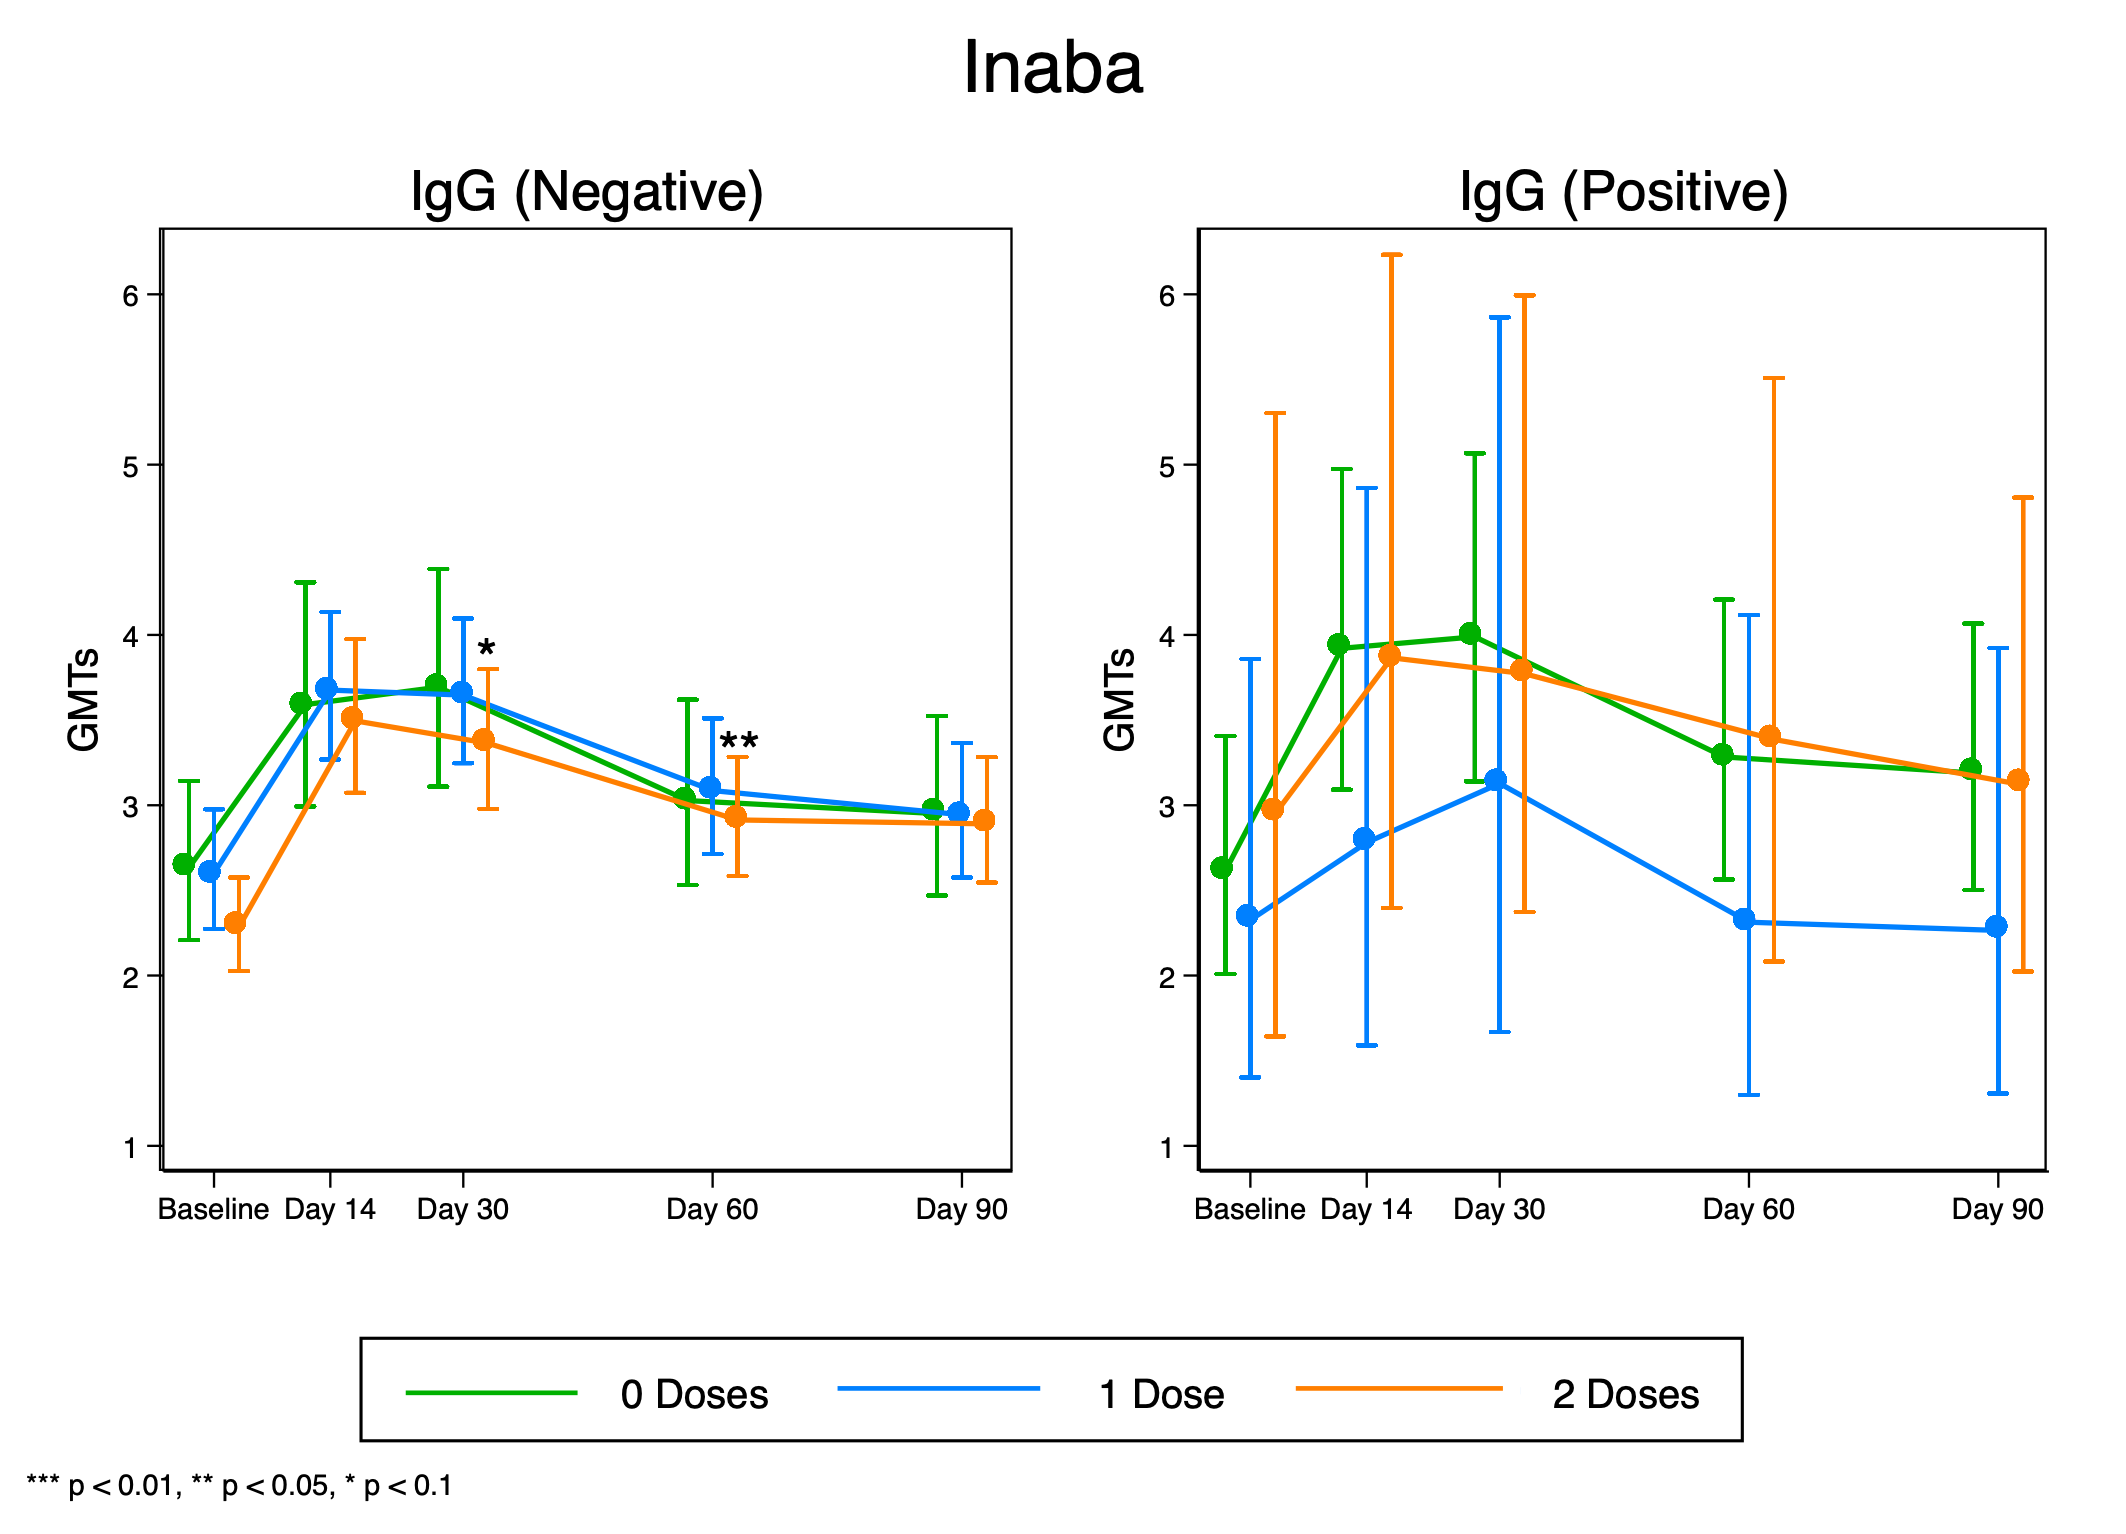


**Scheme 2.** Shows vibriocidal geometric mean antibody titres to Inaba in participants with high (positive) or lower (negative) baseline IgG antibodies across treatment arms.>.


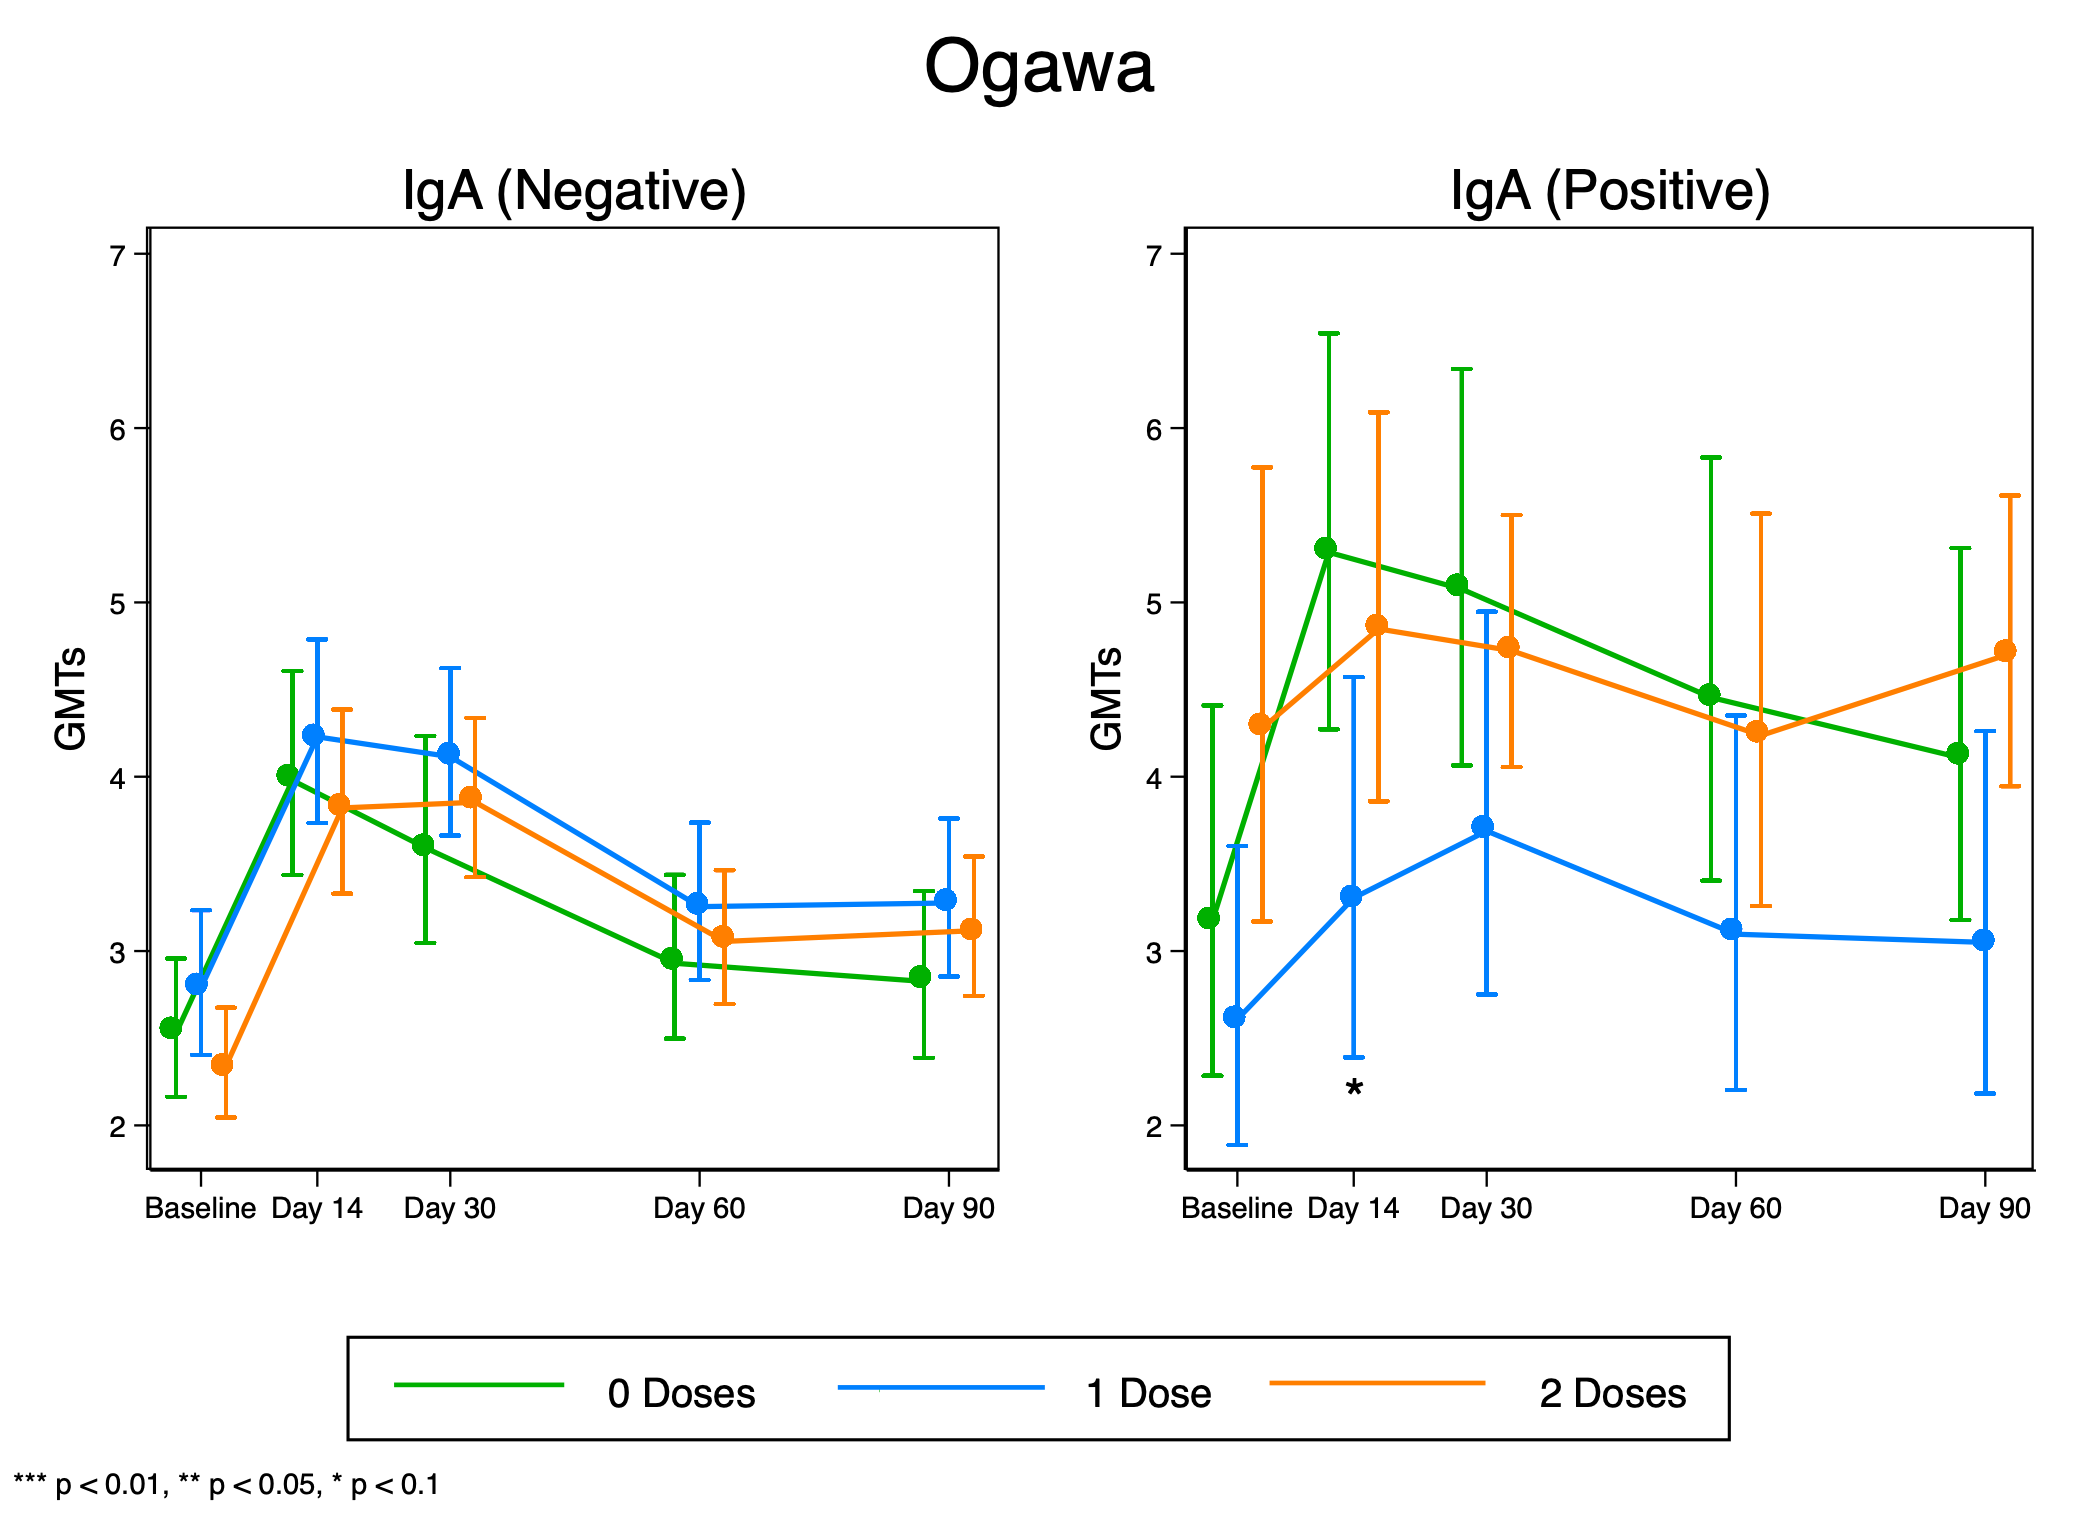


**Scheme 3.** Shows vibriocidal geometric mean antibody titres to Ogawa in participants with high (positive) or lower (negative) baseline IgA antibodies across treatment arms.>.


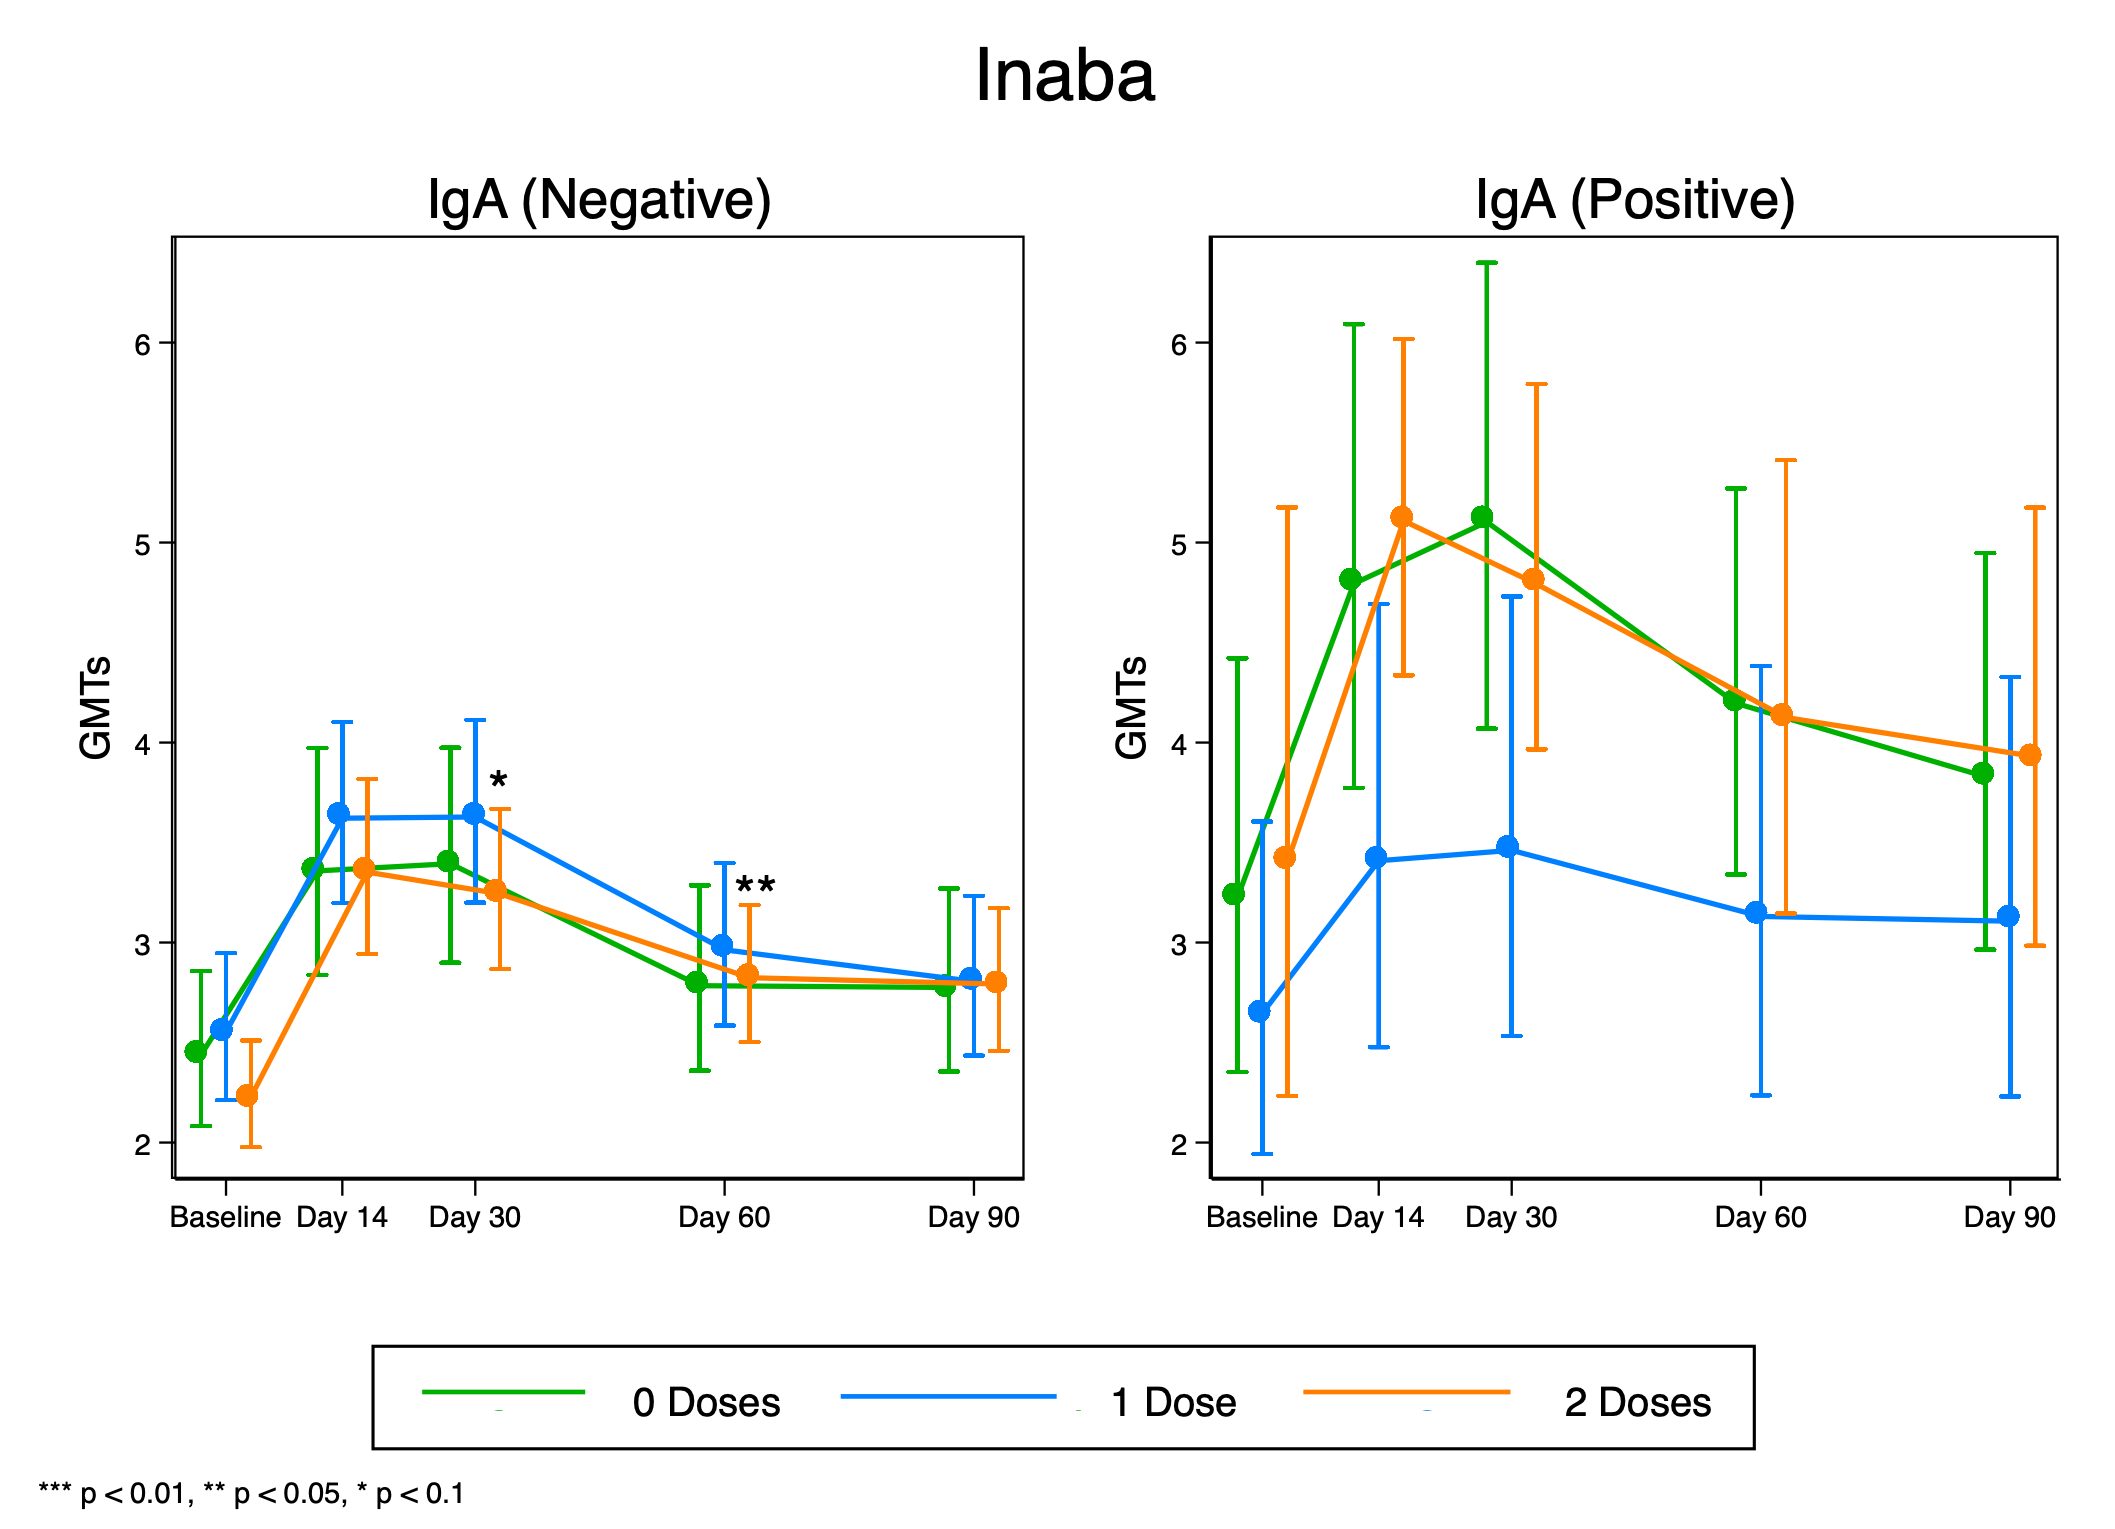


**Scheme 4.** Shows vibriocidal geometric mean antibody titres to Inaba in participants with high (positive) or lower (negative) baseline IgA antibodies across treatment arms.>.


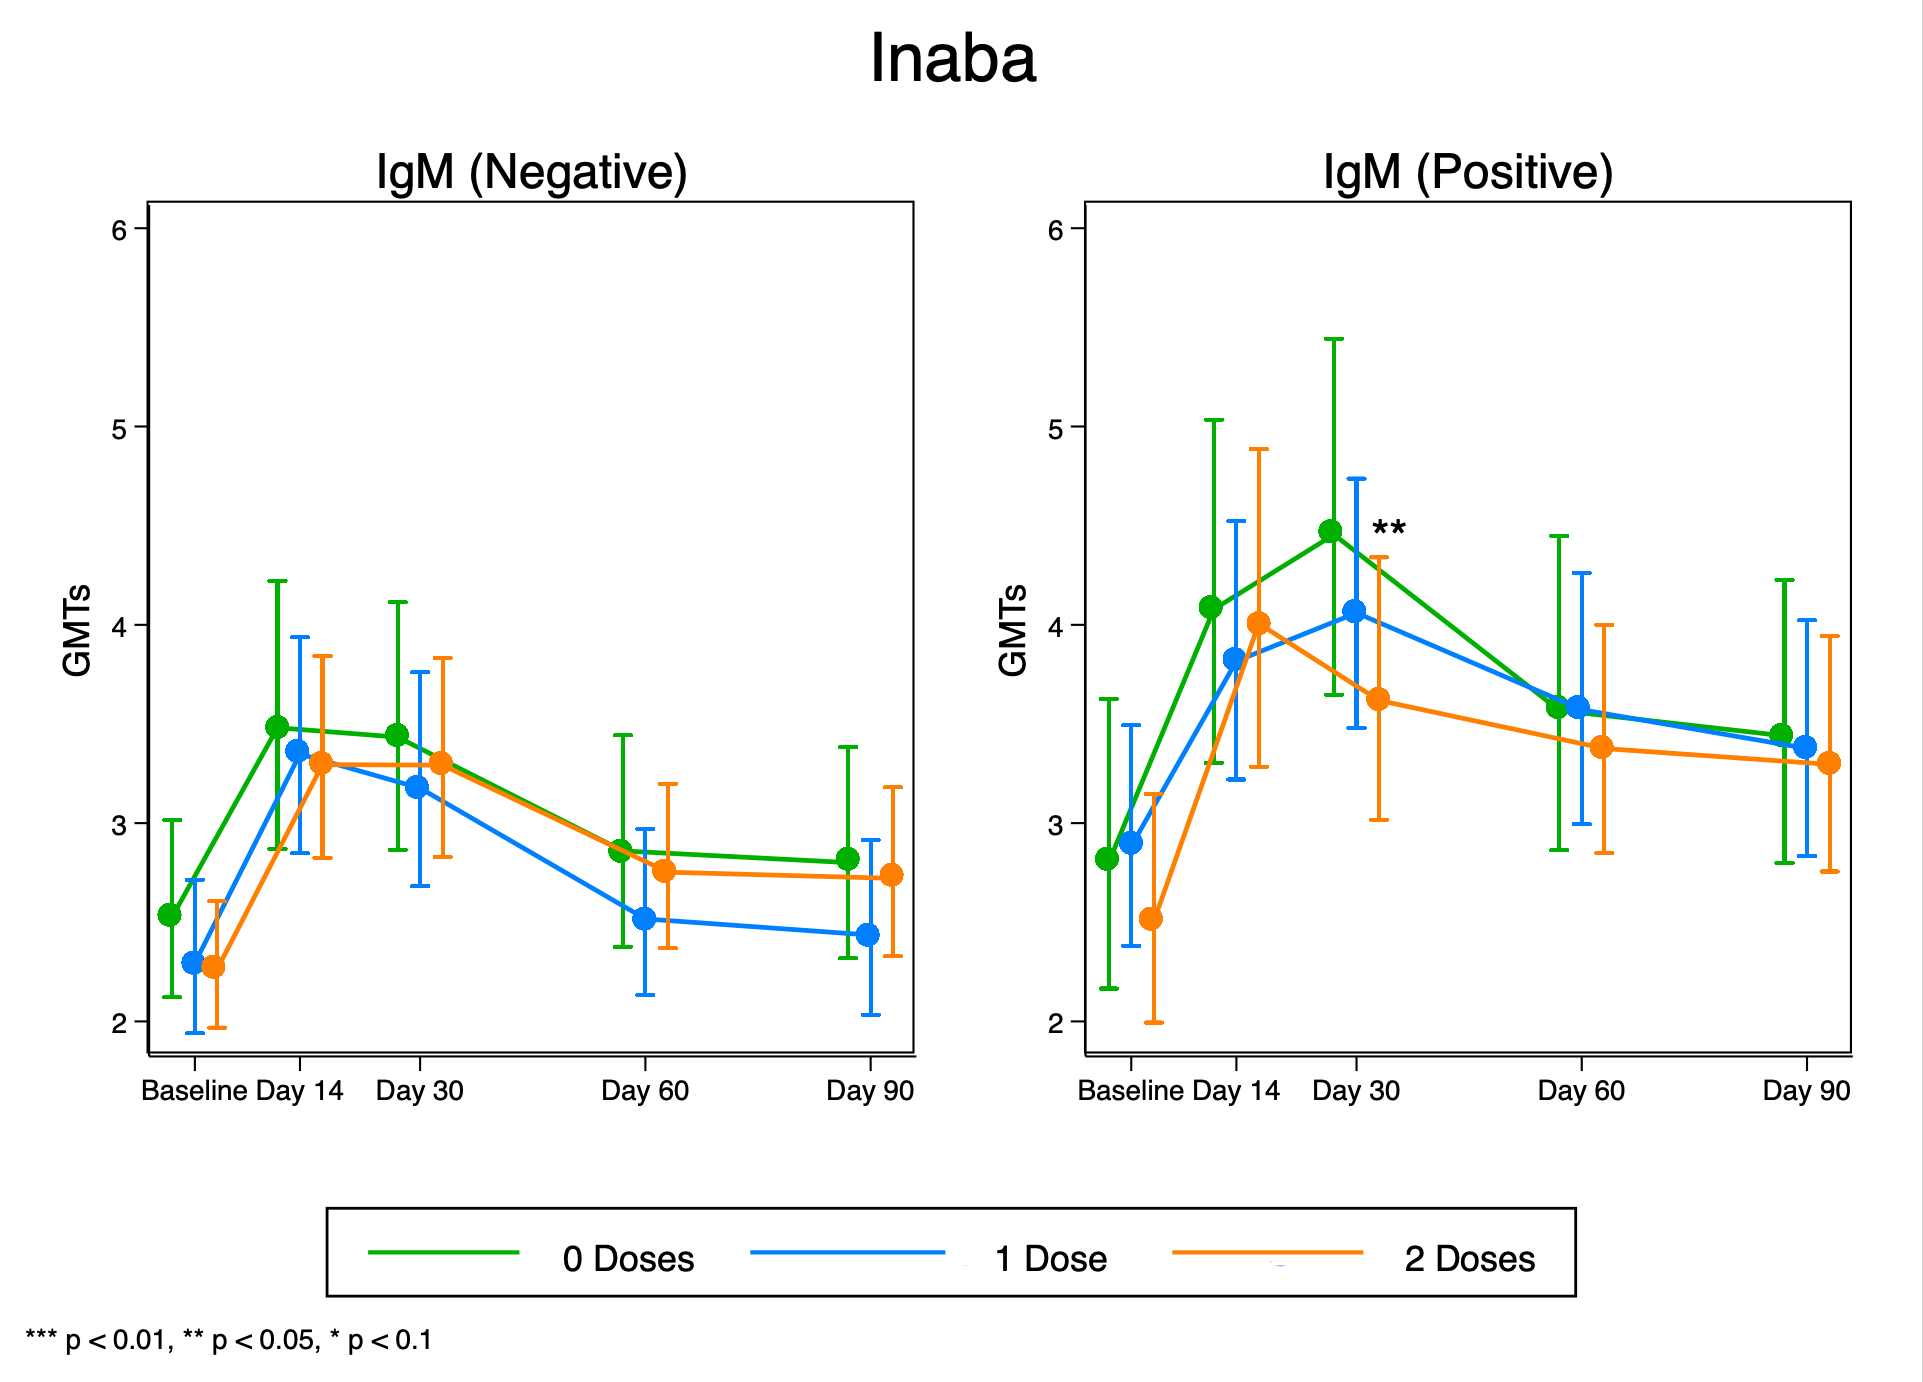


**Scheme 5.** Shows vibriocidal geometric mean antibody titres to serotype Inaba in participants with high (positive) or lower (negative) baseline IgM antibodies across treatment arms.>.


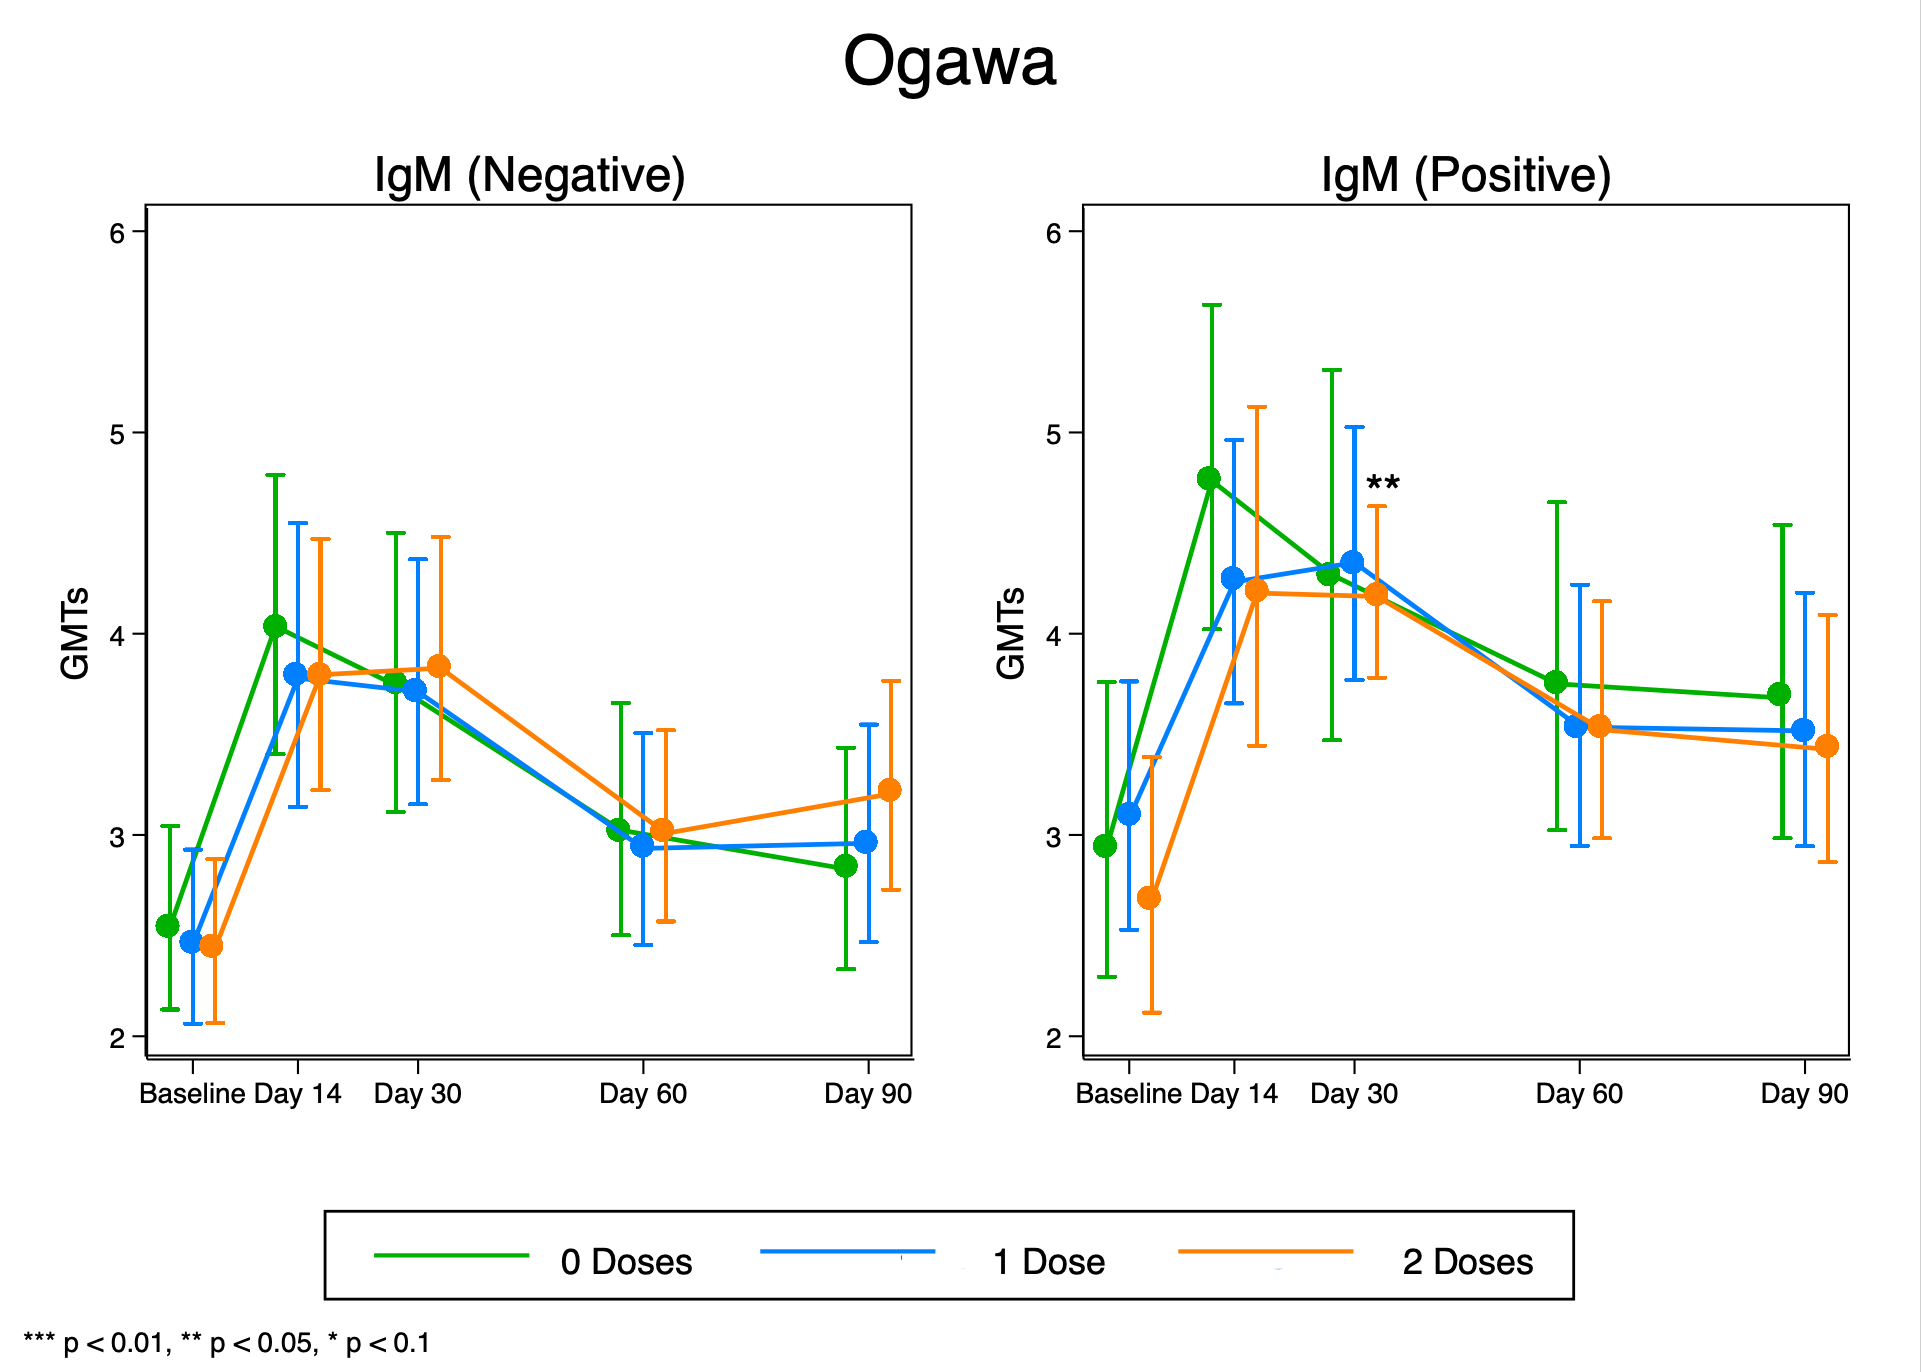


**Scheme 6.** Shows vibriocidal geometric mean antibody titres to Ogawa in participants with high (positive) or lower (negative) baseline IgM antibodies across treatment arms.>.


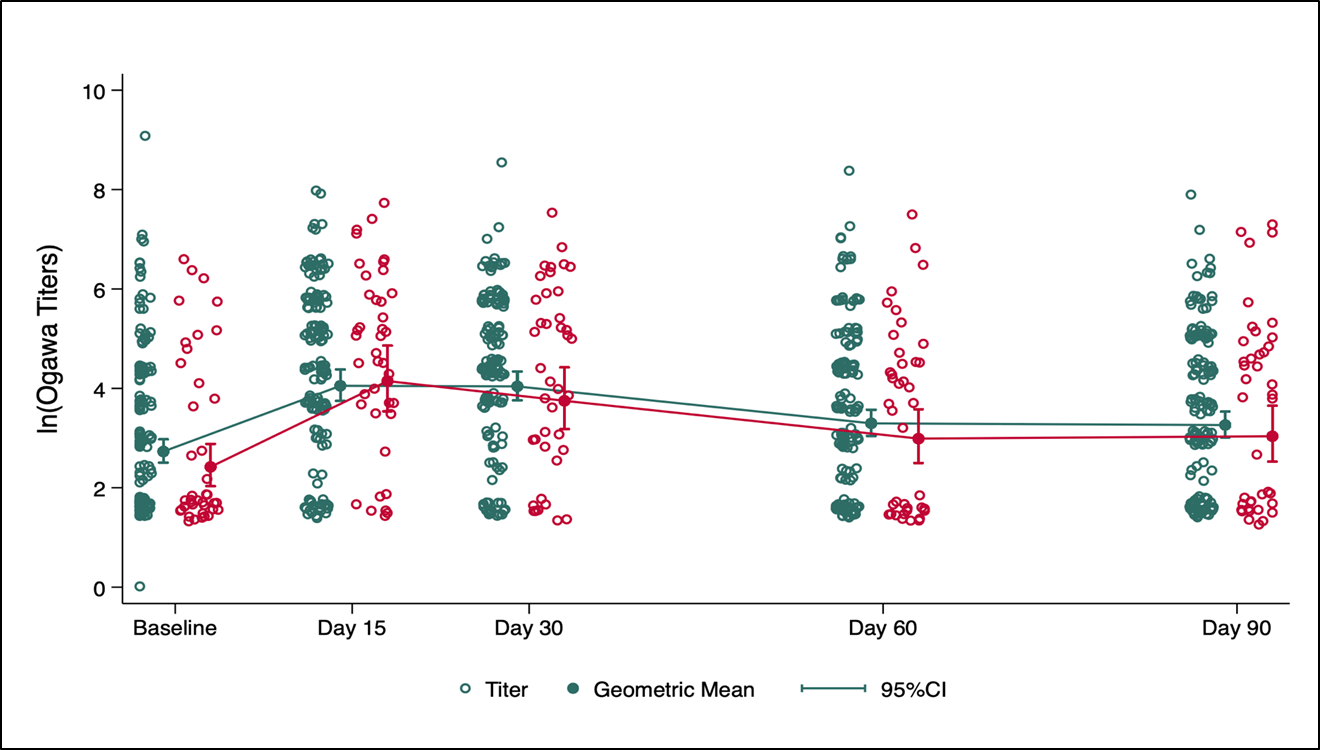


**Scheme 7.** Ogawa titers kinetics by HIV status. Emerald (HIV-), Red (HIV+).


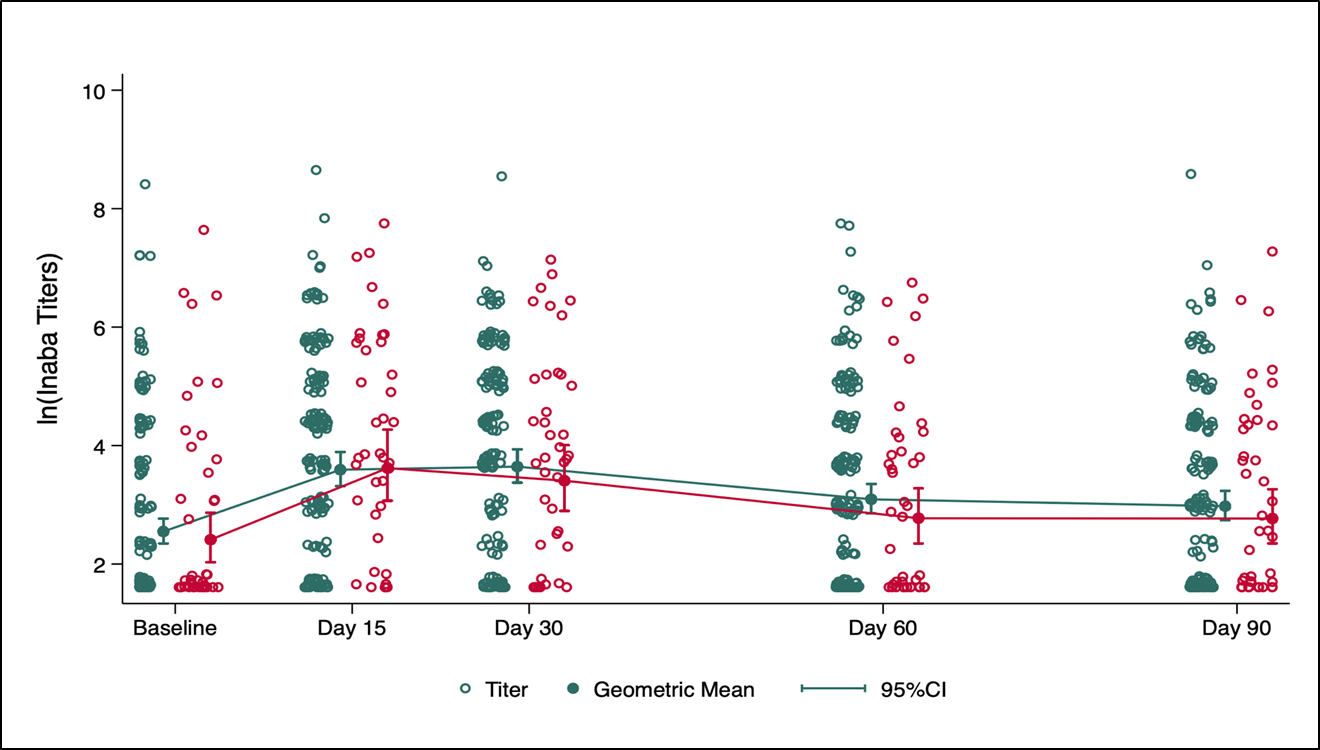


**Scheme 8.** Inaba titers kinetics by HIV status. Emerald (HIV-), Red (HIV+)>.
